# Supplementary material for: Lung Inflammation Resolution by RvD1 and RvD2 in a Receptor-Dependent Manner
Source: MDPI journal article supplement (doi:10.3390/pharmaceutics15051527), 2023-05-18
Supplement: s1 [file s1]

# Supplementary materials

*Article*

## **Lung inflammation resolution by RvD1 and RvD2 in a receptor dependent manner**

Jin Gao, Yujie Su, and Zhenjia Wang \*

Department of Pharmaceutical Sciences, College of Pharmacy and Pharmaceutical Sciences, Washington State University, Spokane, WA 99210, USA

\* Correspondence: [zhenjia.wang@wsu.edu](mailto:zhenjia.wang@wsu.edu)

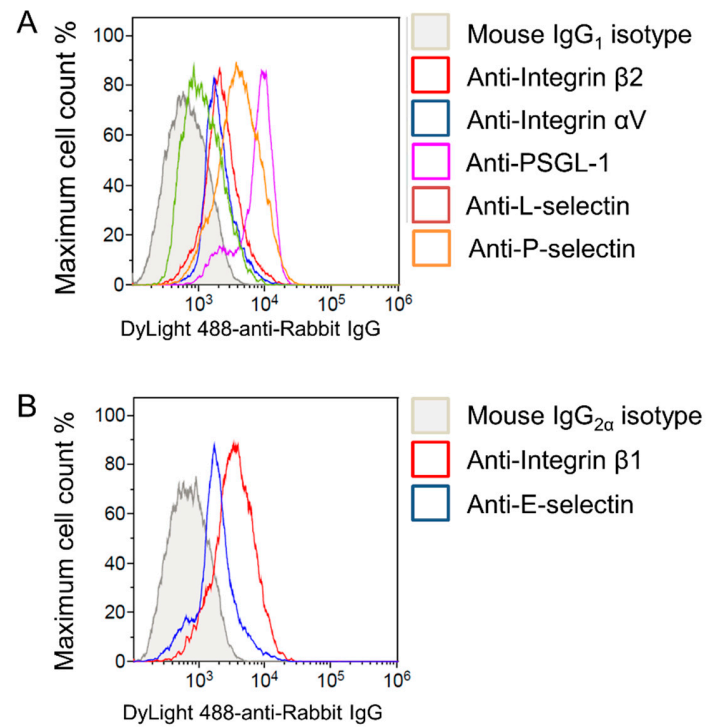

Figure S1. Expression of the adherent molecules on the surface of HL60 cells. HL60 cells were differentiated for 4 days with 1.25% (v/v) DMSO. Rabbit IgG1 isotype antibody (A) and Rabbit IgG2 $\alpha$  isotype antibody (B) as negative controls for monoclonal antibodies.

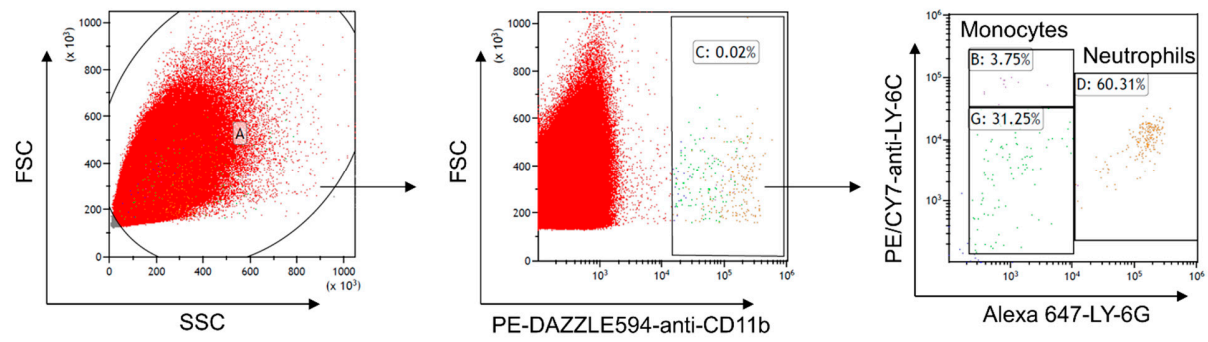

Figure S2. Gating strategy for circulating monocytes and neutrophils. Monocytes are populated as CD11b<sup>+</sup>LY-6C<sup>high</sup>LY-6G<sup>-</sup>. Neutrophils are populated as CD11b<sup>+</sup>LY-6C<sup>low</sup>LY-6G<sup>+</sup>.
